# Supplementary material for: Synthesis and structural characterisation of the aggregates of benzo-1,2-chalcogenazole 2-oxides
Source: Royal Society of Chemistry journal article supplement (doi:10.1039/c7dt00612h), 2017-01-01
Supplement: c7dt00612h1.pdf [file c7dt00612h1.pdf]

**Synthesis and Structural Characterisation of the Aggregates of  
Benzo-1,2-Chalcogenazole 2-Oxides**

Peter C. Ho,<sup>a</sup> Jamal Rafique,<sup>b</sup> Jiwon Lee,<sup>a</sup> Lucia M. Lee,<sup>a</sup> Hilary A. Jenkins,<sup>a</sup> James F. Britten,<sup>a</sup>  
Antonio L. Braga,<sup>b\*</sup> Ignacio Vargas-Baca<sup>a\*</sup>

**Electronic Supplementary Information**

- a) Department of Chemistry and Chemical Biology, McMaster University, 1280 Main Street West, Hamilton, Ontario, Canada L8S 4M1.*
- b) Department of Chemistry, Federal University of Santa Catarina, Florianópolis, Santa Catarina, Brazil 88040-900.*

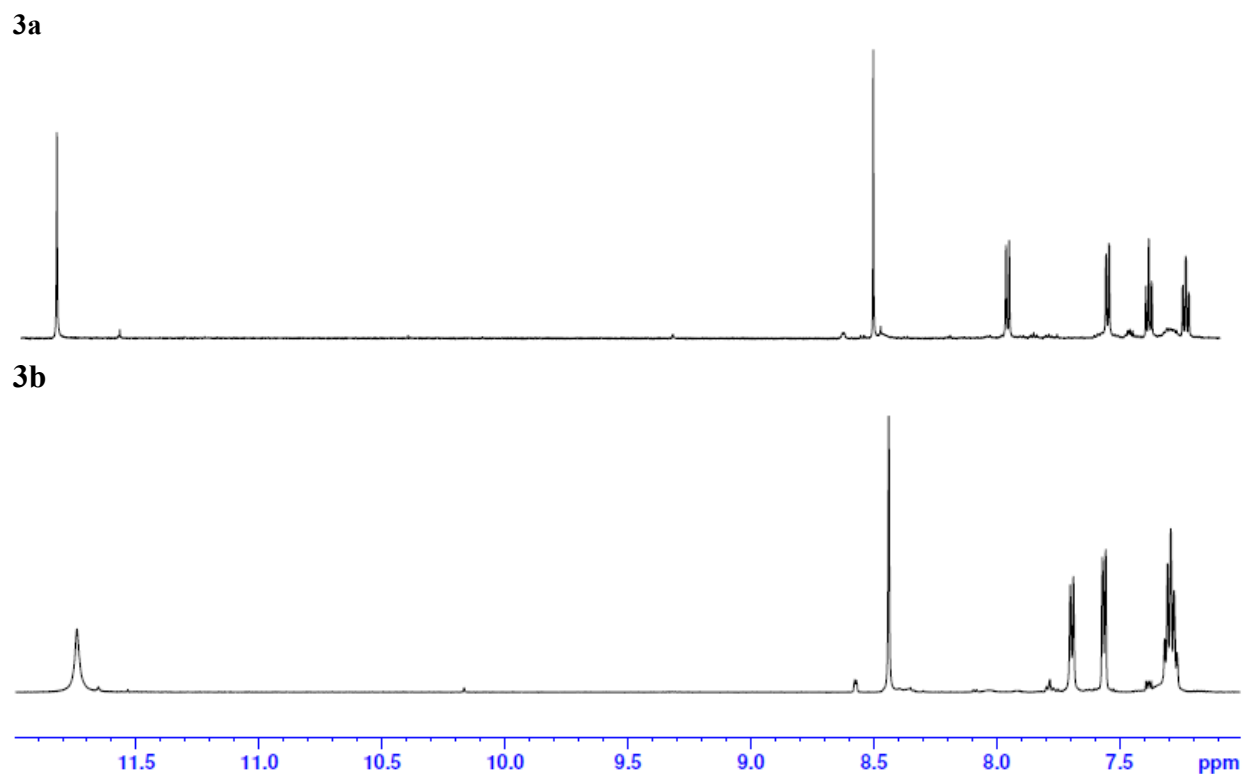

**Figure S1.** Room temperature  $^1\text{H-NMR}$  NMR spectra of **3a** and **3b** in  $\text{DMSO-d}_6$  solution.

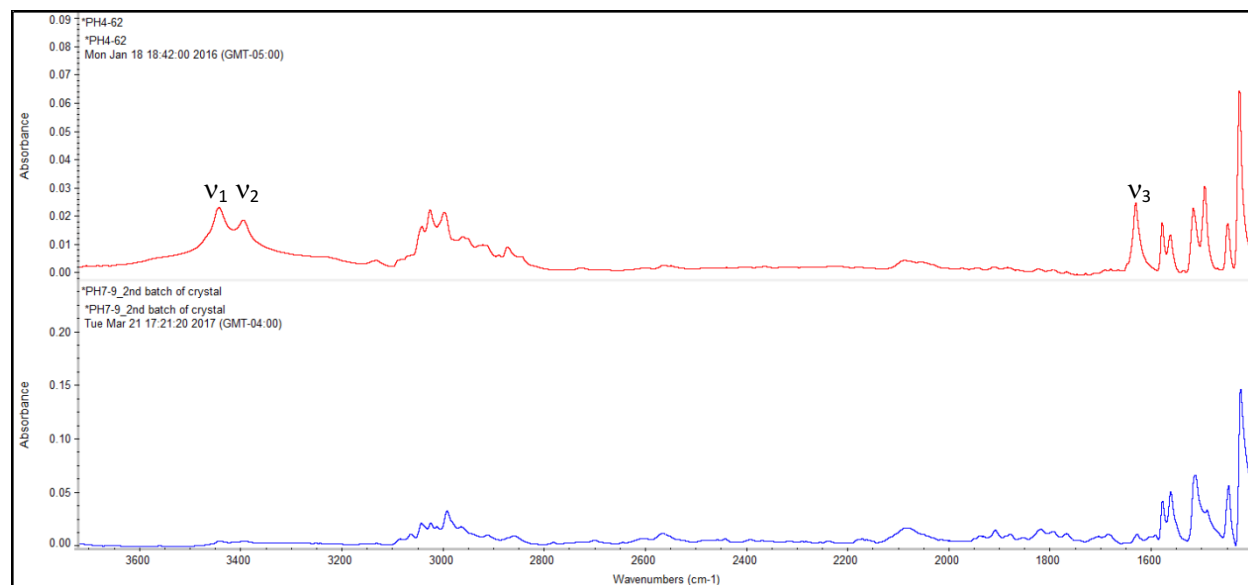

**Figure S2.** ATR- IR spectra of  $2\mathbf{a}_6(\text{CH}_2\text{Cl}_2)_{1.78}(\text{H}_2\text{O})_{0.22}$  (top) and **2a** (bottom). In the former, the three normal vibrational modes of molecular water are visible:  $\nu_1$  asymmetric stretch,  $\nu_2$  symmetric stretch, and bending  $\nu_3$ .

**Table S1.** Selected structural data for all compounds.

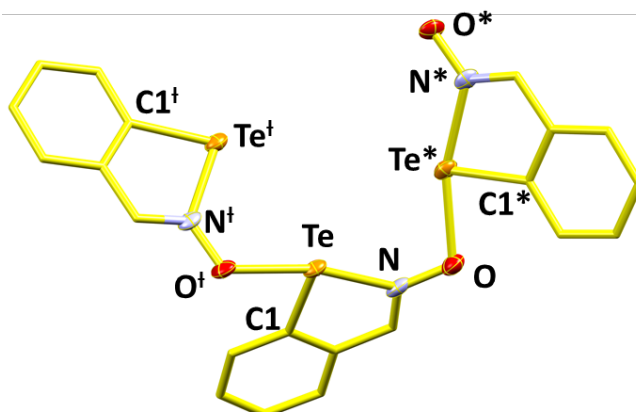

Labeling Scheme: \* and † denote chemically equivalent atoms in neighboring molecules of **2** as shown.

| Aggregate                 | <b>2a<sub>6</sub></b> | <b>2a<sub>4</sub></b><br>(chair) | <b>2a<sub>4</sub></b><br>(boat) | <b>2b</b> |
|---------------------------|-----------------------|----------------------------------|---------------------------------|-----------|
| <b>Bond Distances (Å)</b> |                       |                                  |                                 |           |
| Te(Se)1-C1                | 2.100(6)              | 2.095(3)                         | 2.102(6)                        | 1.896(5)  |
|                           | 2.102(7)              | 2.101(2)                         | 2.103(6)                        |           |
|                           | 2.106(7)              |                                  |                                 |           |
|                           | 2.107(8)              |                                  |                                 |           |
|                           | 2.111(6)              |                                  |                                 |           |
|                           | 2.114(8)              |                                  |                                 |           |
| Te(Se)1-N1                | 2.261(5)              | 2.197(2)                         | 2.244(5)                        | 1.938(5)  |
|                           | 2.262(5)              | 2.234(2)                         | 2.250(4)                        |           |
|                           | 2.262(5)              |                                  |                                 |           |
|                           | 2.263(5)              |                                  |                                 |           |
|                           | 2.267(4)              |                                  |                                 |           |
|                           | 2.268(4)              |                                  |                                 |           |
| Te(Se)1...O1†             | 2.178(5)              | 2.235(2)                         | 2.201(4)                        | 2.412(5)  |
|                           | 2.186(5)              | 2.245(2)                         | 2.213(4)                        |           |
|                           | 2.189(4)              |                                  |                                 |           |
|                           | 2.189(6)              |                                  |                                 |           |
|                           | 2.190(4)              |                                  |                                 |           |
|                           | 2.201(5)              |                                  |                                 |           |
| N1-O1                     | 1.363(6)              | 1.357(3)                         | 1.361(7)                        | 1.315(6)  |
|                           | 1.363(9)              | 1.354(3)                         | 1.368(5)                        |           |
|                           | 1.366(8)              |                                  |                                 |           |
|                           | 1.367(9)              |                                  |                                 |           |
|                           | 1.368(9)              |                                  |                                 |           |
|                           | 1.376(6)              |                                  |                                 |           |

|                    |           |           |           |           |
|--------------------|-----------|-----------|-----------|-----------|
| N1-O1†             | 4.405(7)  | 4.379(2)  | 4.398(6)  | 4.340(7)  |
|                    | 4.407(7)  | 4.439(3)  | 4.411(6)  |           |
|                    | 4.408(8)  |           |           |           |
|                    | 4.410(7)  |           |           |           |
|                    | 4.411(6)  |           |           |           |
|                    | 4.423(8)  |           |           |           |
| C1-C2              | 1.40(1)   | 1.409(3)  | 1.403(9)  | 1.406(8)  |
|                    | 1.40(1)   | 1.409(4)  | 1.409(7)  |           |
|                    | 1.40(1)   |           |           |           |
|                    | 1.403(9)  |           |           |           |
|                    | 1.405(8)  |           |           |           |
|                    | 1.41(1)   |           |           |           |
| C2-C3              | 1.44(1)   | 1.441(3)  | 1.430(9)  | 1.446(8)  |
|                    | 1.44(1)   | 1.446(4)  | 1.443(8)  |           |
|                    | 1.44(1)   |           |           |           |
|                    | 1.440(7)  |           |           |           |
|                    | 1.45(1)   |           |           |           |
|                    | 1.451(7)  |           |           |           |
| C3-N1              | 1.286(9)  | 1.286(3)  | 1.286(7)  | 1.308(7)  |
|                    | 1.289(8)  | 1.294(3)  | 1.287(7)  |           |
|                    | 1.29(1)   |           |           |           |
|                    | 1.293(7)  |           |           |           |
|                    | 1.298(9)  |           |           |           |
|                    | 1.30(1)   |           |           |           |
| Te(Se)1···Te(Se)1† | 3.6377(7) | 3.6989(2) | 3.6846(8) | 4.0795(9) |
|                    | 3.6524(7) | 4.3637(4) | 3.7134(8) |           |
|                    | 3.6719(5) |           |           |           |
|                    | 3.6737(7) |           |           |           |
|                    | 3.7285(5) |           |           |           |
|                    | 3.7327(7) |           |           |           |

---

**Bond Angles (°)**

---

|                |          |           |          |          |
|----------------|----------|-----------|----------|----------|
| N1-Te(Se)1-O1† | 163.6(2) | 162.37(7) | 161.3(2) | 172.3(2) |
|                | 163.9(2) | 164.45(7) | 164.6(1) |          |
|                | 164.1(2) |           |          |          |
|                | 164.6(2) |           |          |          |
|                | 164.6(2) |           |          |          |
|                | 164.7(2) |           |          |          |
| N1-Te(Se)1-C1  | 75.7(2)  | 76.40(8)  | 75.8(2)  | 84.3(2)  |
|                | 75.6(2)  | 76.61(8)  | 76.0(2)  |          |
|                | 75.7(2)  |           |          |          |
|                | 75.7(2)  |           |          |          |
|                | 75.7(2)  |           |          |          |
|                | 75.3(2)  |           |          |          |

|                               |          |          |          |          |
|-------------------------------|----------|----------|----------|----------|
| O1-N1-Te(Se)1                 | 126.9(4) | 122.7(1) | 125.4(3) | 118.8(4) |
|                               | 127.0(4) | 126.3(1) | 127.2(3) |          |
|                               | 127.2(4) |          |          |          |
|                               | 126.6(4) |          |          |          |
|                               | 126.6(4) |          |          |          |
|                               | 127.1(4) |          |          |          |
|                               | 127.1(4) |          |          |          |
| <b>Torsion Angles (°)</b>     |          |          |          |          |
| Te(Se)1-N1-O1-                | 11.2(6)  | 19.0(2)  | 1.4(5)   | 86.3(4)  |
| Te(Se)1*                      | 12.6(6)  | 89.4(1)  | 42.6(4)  |          |
|                               | 2.2(6)   |          |          |          |
|                               | 6.6(6)   |          |          |          |
|                               | 15.0(6)  |          |          |          |
|                               | 5.5(6)   |          |          |          |
| N1-O1-Te(Se)1*-               | 83.7(4)  | 116.6(1) | 105.0(3) | 129.2(4) |
| C1*                           | 78.5(4)  | 122.6(1) | 159.2(3) |          |
|                               | 85.2(4)  |          |          |          |
|                               | 84.2(4)  |          |          |          |
|                               | 75.9(4)  |          |          |          |
|                               | 83.3(4)  |          |          |          |
| C1-Te(Se)1-N1-                | 177.2(5) | 178.6(2) | 176.1(4) | 178.2(4) |
| O1                            | 179.3(5) | 179.0(2) | 178.5(4) |          |
|                               | 180.0(5) |          |          |          |
|                               | 179.9(5) |          |          |          |
|                               | 178.6(5) |          |          |          |
|                               | 179.5(5) |          |          |          |
| <b>Interplanar Angles (°)</b> |          |          |          |          |
|                               | 80.09    | 70.84    | 50.87    | 72.10    |
|                               | 82.04    |          | 74.51    |          |
|                               | 83.07    |          |          |          |
|                               | 83.12    |          |          |          |
|                               | 86.52    |          |          |          |
|                               | 88.77    |          |          |          |

**Table S2.** DFT-Optimized Cartesian coordinates of **2a**, **2b** and their dimers.

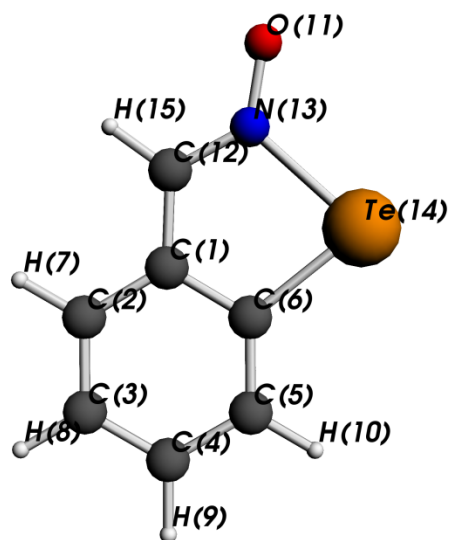

**2a**

Total Bond Energy = -9314.82 kJ/mol, -3.55 hartree

| Atom  | X         | Y         | Z        | (Angstrom) |
|-------|-----------|-----------|----------|------------|
| 1.C   | -3.717693 | -4.239105 | 0.000000 |            |
| 2.C   | -4.927871 | -4.963897 | 0.000000 |            |
| 3.C   | -4.915857 | -6.353082 | 0.000000 |            |
| 4.C   | -3.699988 | -7.052334 | 0.000000 |            |
| 5.C   | -2.488146 | -6.359998 | 0.000000 |            |
| 6.C   | -2.497811 | -4.964659 | 0.000000 |            |
| 7.H   | -5.872448 | -4.419102 | 0.000000 |            |
| 8.H   | -5.857283 | -6.901597 | 0.000000 |            |
| 9.H   | -3.696025 | -8.142001 | 0.000000 |            |
| 10.H  | -1.546916 | -6.909037 | 0.000000 |            |
| 11.O  | -2.305413 | -0.949017 | 0.000000 |            |
| 12.C  | -3.668484 | -2.812676 | 0.000000 |            |
| 13.N  | -2.502871 | -2.179840 | 0.000000 |            |
| 14.Te | -0.865454 | -3.657946 | 0.000000 |            |
| 15.H  | -4.552153 | -2.177110 | 0.000000 |            |

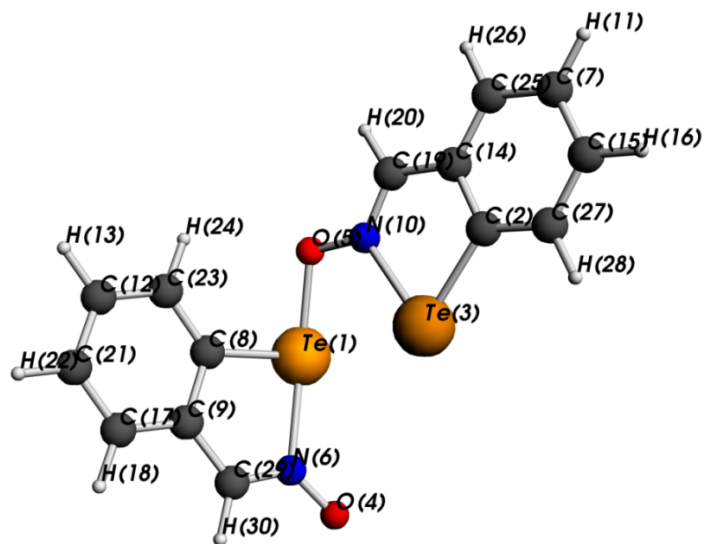

2a<sub>2</sub>

Total Bonding Energy = -18704.63 kJ/mol, -7.12 hartree

| Atom | X        | Y         | Z         | (Angstrom) |
|------|----------|-----------|-----------|------------|
| 1.Te | 2.995963 | 3.400325  | 8.437837  |            |
| 2.C  | 4.383492 | 5.597551  | 4.132943  |            |
| 3.Te | 3.836790 | 3.989314  | 5.415947  |            |
| 4.O  | 2.010968 | 0.521102  | 7.850344  |            |
| 5.O  | 3.780084 | 5.614603  | 8.066175  |            |
| 6.N  | 2.958047 | 1.162561  | 8.371368  |            |
| 7.C  | 5.063988 | 7.885571  | 2.670591  |            |
| 8.C  | 4.832221 | 2.956000  | 9.359365  |            |
| 9.C  | 5.028192 | 1.557234  | 9.477354  |            |
| 10.N | 3.990722 | 5.730910  | 6.786840  |            |
| 11.H | 5.327336 | 8.771144  | 2.092945  |            |
| 12.C | 6.925835 | 3.393548  | 10.460881 |            |
| 13.H | 7.662725 | 4.101032  | 10.840563 |            |
| 14.C | 4.528008 | 6.840115  | 4.786482  |            |
| 15.C | 4.919456 | 6.646873  | 2.026528  |            |
| 16.H | 5.073292 | 6.574116  | 0.949658  |            |
| 17.C | 6.203451 | 1.105532  | 10.108633 |            |
| 18.H | 6.372540 | 0.032974  | 10.210598 |            |
| 19.C | 4.311938 | 6.855932  | 6.203219  |            |
| 20.H | 4.404223 | 7.748090  | 6.821513  |            |
| 21.C | 7.137045 | 2.015685  | 10.595632 |            |
| 22.H | 8.040200 | 1.650096  | 11.084123 |            |
| 23.C | 5.766138 | 3.868789  | 9.840882  |            |
| 24.H | 5.593652 | 4.938164  | 9.727421  |            |
| 25.C | 4.870291 | 7.985962  | 4.042685  |            |
| 26.H | 4.979194 | 8.945130  | 4.551127  |            |
| 27.C | 4.578475 | 5.504856  | 2.752602  |            |
| 28.H | 4.467369 | 4.549727  | 2.236910  |            |
| 29.C | 4.038592 | 0.663571  | 8.946027  |            |
| 30.H | 4.130851 | -0.421839 | 8.980863  |            |

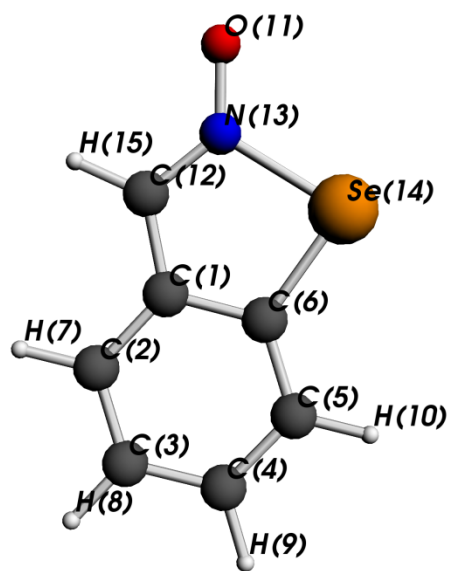

**2b**

Total Bond Energy = -9398.05 kJ/mol, -3.58 hartree

| Atom  | X         | Y         | Z        | (Angstrom) |
|-------|-----------|-----------|----------|------------|
| 1.C   | -3.684885 | -4.208221 | 0.000000 |            |
| 2.C   | -4.872469 | -4.964056 | 0.000000 |            |
| 3.C   | -4.811105 | -6.352797 | 0.000000 |            |
| 4.C   | -3.572075 | -7.012655 | 0.000000 |            |
| 5.C   | -2.379970 | -6.287624 | 0.000000 |            |
| 6.C   | -2.442238 | -4.893986 | 0.000000 |            |
| 7.H   | -5.833990 | -4.450360 | 0.000000 |            |
| 8.H   | -5.732724 | -6.933591 | 0.000000 |            |
| 9.H   | -3.534956 | -8.101720 | 0.000000 |            |
| 10.H  | -1.420261 | -6.803248 | 0.000000 |            |
| 11.O  | -2.083335 | -1.031538 | 0.000000 |            |
| 12.C  | -3.604664 | -2.786628 | 0.000000 |            |
| 13.N  | -2.398083 | -2.232742 | 0.000000 |            |
| 14.Se | -1.003445 | -3.675095 | 0.000000 |            |
| 15.H  | -4.449854 | -2.103452 | 0.000000 |            |



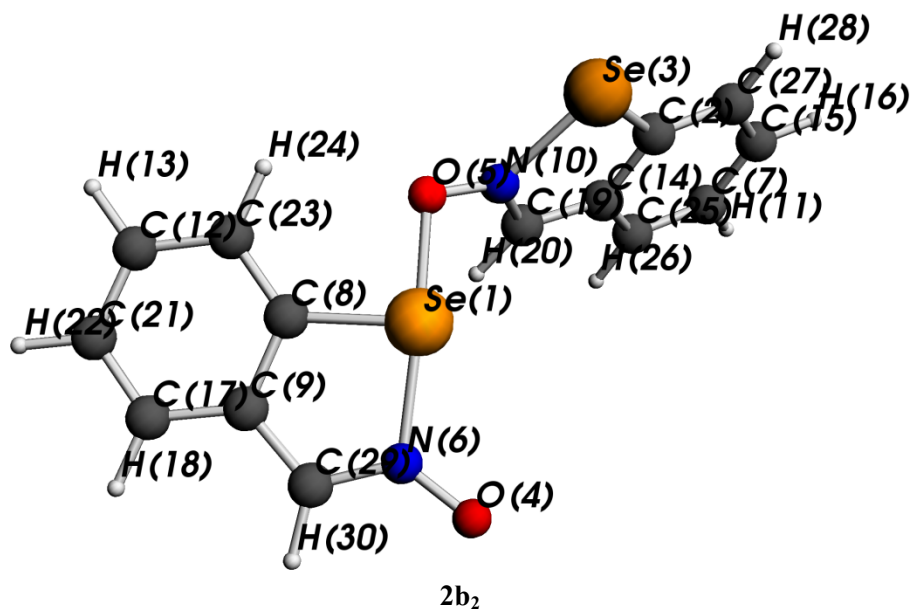

Total Bond Energy = -18827.30 kJ/mol, -7.17 hartree

| Atom | X        | Y        | Z         | (Angstrom) |
|------|----------|----------|-----------|------------|
| 1.Se | 3.357661 | 2.804381 | 8.465051  |            |
| 2.C  | 4.051302 | 6.086152 | 4.012839  |            |
| 3.Se | 5.096985 | 4.518789 | 4.095027  |            |
| 4.O  | 0.754224 | 2.111902 | 9.404781  |            |
| 5.O  | 5.422081 | 3.798342 | 6.825674  |            |
| 6.N  | 1.942441 | 2.243790 | 9.762672  |            |
| 7.C  | 2.492576 | 8.369122 | 4.315591  |            |
| 8.C  | 4.553838 | 2.686695 | 9.925950  |            |
| 9.C  | 3.872677 | 2.281732 | 11.104669 |            |
| 10.N | 4.902030 | 4.650726 | 6.062776  |            |
| 11.H | 1.880286 | 9.263780 | 4.420914  |            |
| 12.C | 6.632344 | 2.787605 | 11.124520 |            |
| 13.H | 7.704749 | 2.981670 | 11.139236 |            |
| 14.C | 3.676461 | 6.509950 | 5.314450  |            |
| 15.C | 2.876661 | 7.935571 | 3.036331  |            |
| 16.H | 2.561879 | 8.494962 | 2.155770  |            |
| 17.C | 4.610077 | 2.137105 | 12.295242 |            |
| 18.H | 4.098443 | 1.826795 | 13.206683 |            |
| 19.C | 4.157222 | 5.699642 | 6.381902  |            |
| 20.H | 3.968521 | 5.856838 | 7.441033  |            |
| 21.C | 5.977281 | 2.388684 | 12.300075 |            |
| 22.H | 6.543532 | 2.274397 | 13.224104 |            |
| 23.C | 5.926045 | 2.939088 | 9.929560  |            |
| 24.H | 6.430775 | 3.249766 | 9.016713  |            |
| 25.C | 2.886063 | 7.667160 | 5.448076  |            |
| 26.H | 2.588666 | 8.000887 | 6.441950  |            |
| 27.C | 3.658555 | 6.792021 | 2.874950  |            |
| 28.H | 3.951902 | 6.459976 | 1.879898  |            |
| 29.C | 2.473311 | 2.056514 | 10.964599 |            |
| 30.H | 1.798303 | 1.744579 | 11.757327 |            |
